# Supplementary material for: Evaluation of Glycemic Control in Critically ill Patients with Bacteremia: A Retrospective, Single-Center Cohort Study
Source: HighWire-hosted journal article supplement (doi:10.1136/jim-2021-002229), 2022-05-23
Supplement: jim-2021-002229supp001_data_supplement.pdf [file jim-2021-002229supp001_data_supplement.pdf]

**Supplemental Figure 1. Screening and stratification**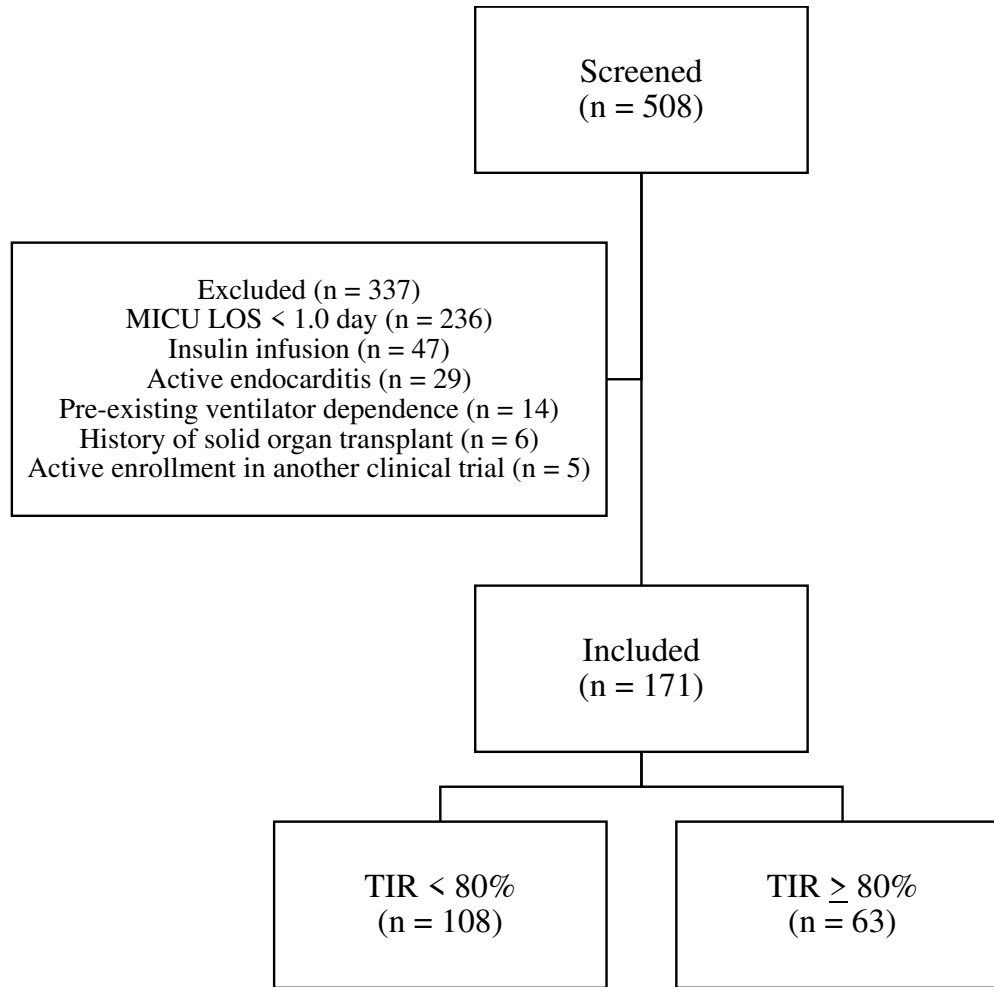

LOS = Length of stay, MICU = Medical intensive care unit, TIR = Time in targeted blood glucose range
